# Supplementary figures and images for: Hypocretin neuron-specific transcriptome profiling identifies the sleep modulator Kcnh4a
Source: eLife journal article supplement (doi:10.7554/elife.08638), 2015-10-01

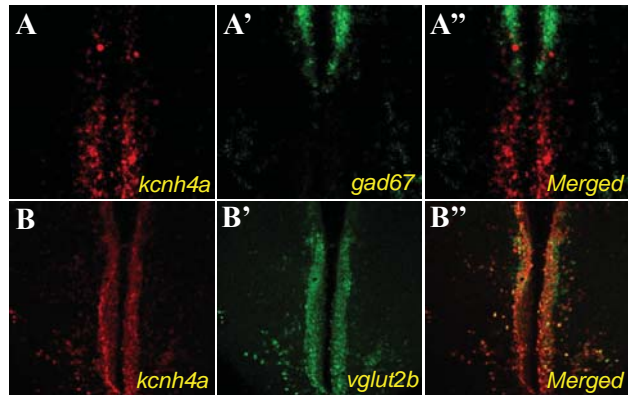

Supplement: supp [file elife_poa_e08638_Figure_6_figure_supplement_1.pdf › elife_poa_e08638_Figure_6_figure_supplement_1.pdf]

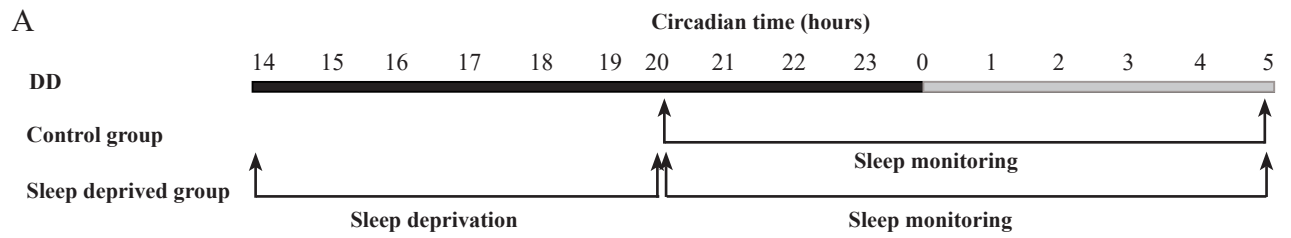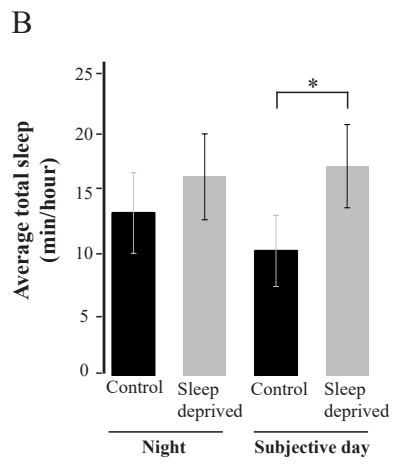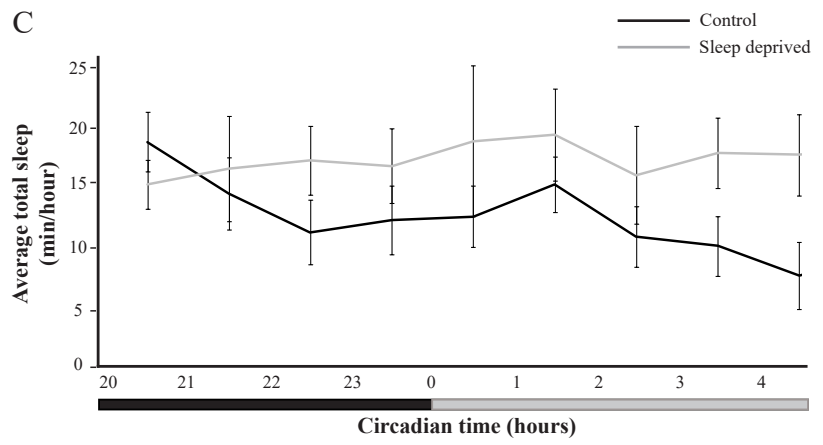

Supplement: supp [file elife_poa_e08638_Figure_7_figure_supplement_1.pdf › elife_poa_e08638_Figure_7_figure_supplement_1.pdf]
